# Supplementary material
Source: PubMed Central journal article supplement (PMC2528115)

**A**  $\Delta G = -6.30$  kcal/mol

**Key for ss-count annotation**

- Likely to be single-stranded
- Intermediate
- Unlikely to be single-stranded

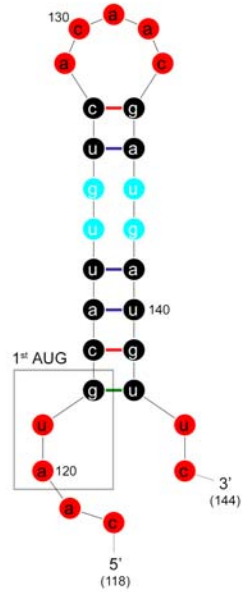

**B**  $\Delta G = -10.80$  kcal/mol

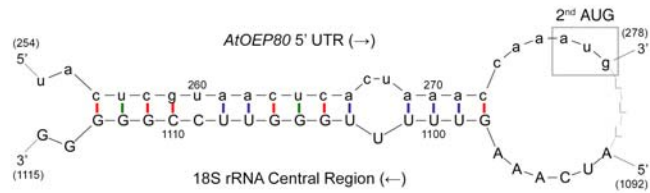

**C**

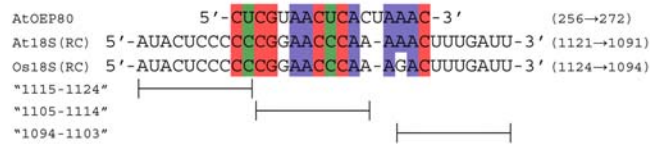

Supplement: pp.108.122754_4.pdf [file pp.108.122754_4.pdf]
