# Supplementary material
Source: PubMed Central journal article supplement (PMC2528115)

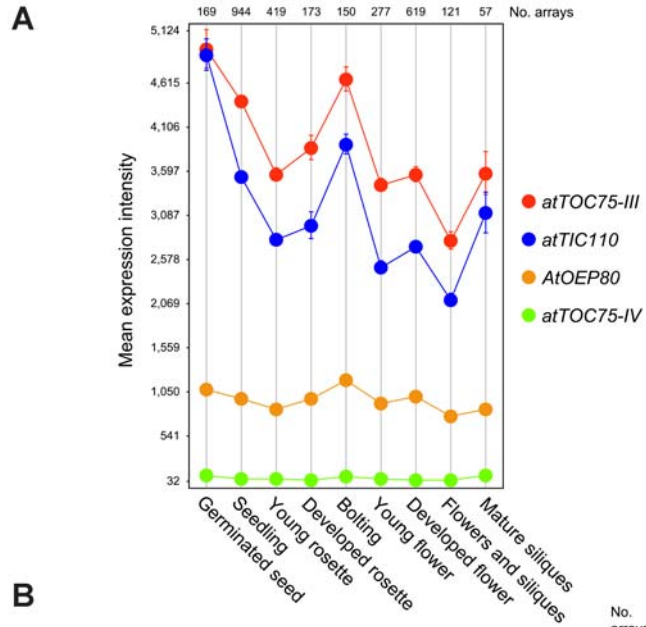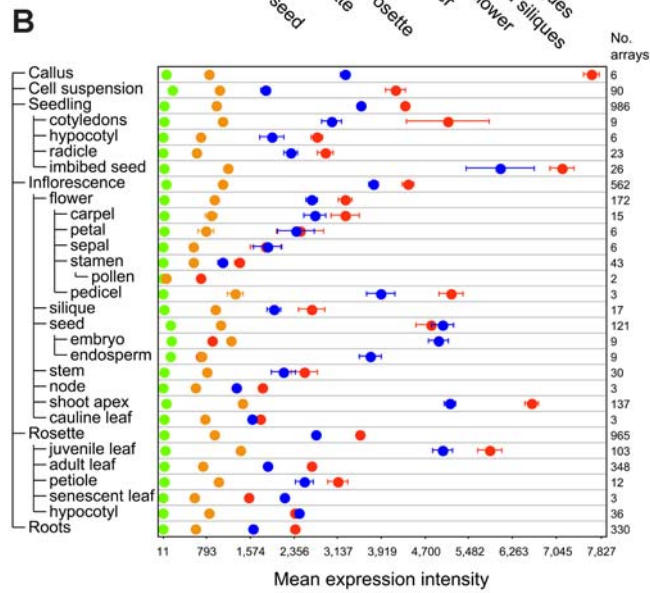

Supplement: pp.108.122754_1.pdf [file pp.108.122754_1.pdf]

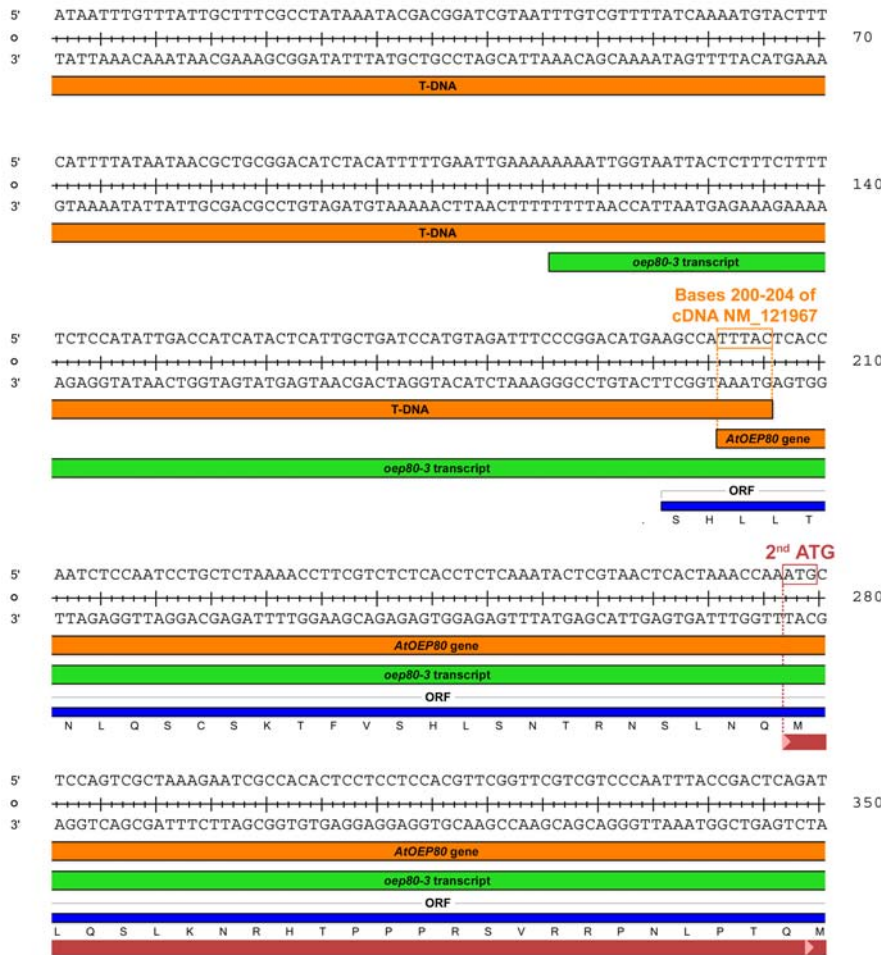

Supplement: pp.108.122754_2.pdf [file pp.108.122754_2.pdf]

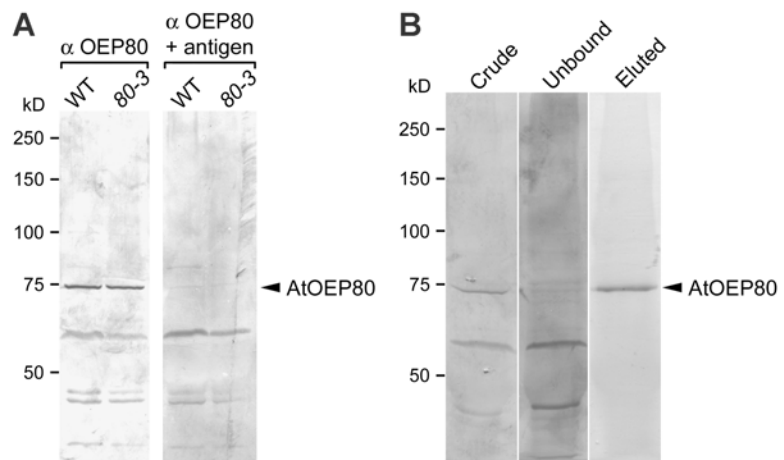

Supplement: pp.108.122754_3.pdf [file pp.108.122754_3.pdf]
